# Supplementary material for: Sustained relief of trigeminal neuropathic pain by a blood–brain barrier penetrable PPAR gamma agonist
Source: PubMed Central journal article supplement — Mol Pain. 2019 Nov 7;15:1744806919884498. doi: 10.1177/1744806919884498 (PMC6843736; doi:10.1177/1744806919884498), 2019-11-07
Supplement: MPX884498_Supplemetal_Table1.pdf [file MPX884498_Supplemetal_Table1.pdf]

Supplementary Table 1: Group mean- Hematology and Coagulation (Mean  $\pm$  SD , N = 3)

| Sex                                     | Male                 |                      |                      |                                            | Female               |                      |                      |                      |
|-----------------------------------------|----------------------|----------------------|----------------------|--------------------------------------------|----------------------|----------------------|----------------------|----------------------|
| Group                                   | Solvent control      | 30 mg/kg             | 120 mg/kg            | 450 mg/kg                                  | Solvent control      | 30 mg/kg             | 120 mg/kg            | 450 mg/kg            |
| WBC (X10 <sup>9</sup> /L)               | 10.23<br>$\pm$ 2.34  | 10.91<br>$\pm$ 0.80  | 10.84<br>$\pm$ 1.27  | 9.45<br>$\pm$ 1.95                         | 6.76<br>$\pm$ 2.70   | 7.19<br>$\pm$ 1.22   | 8.88<br>$\pm$ 2.51   | 8.85<br>$\pm$ 0.67   |
| Hemoglobin (g/L)                        | 149<br>$\pm$ 4       | 149<br>$\pm$ 2       | 145<br>$\pm$ 9       | <b>140</b><br><b><math>\pm</math>4*</b>    | 149<br>$\pm$ 6       | 147<br>$\pm$ 5       | 154<br>$\pm$ 3       | 152<br>$\pm$ 6       |
| Erythrocyte (X10 <sup>12</sup> /L)      | 7.41<br>$\pm$ 0.14   | 7.39<br>$\pm$ 0.31   | 7.41<br>$\pm$ 0.42   | 7.34<br>$\pm$ 0.18                         | 7.82<br>$\pm$ 0.22   | 7.62<br>$\pm$ 0.20   | 7.98<br>$\pm$ 0.13   | 8.02<br>$\pm$ 0.32   |
| Hematocrit (%)                          | 46.9<br>$\pm$ 1.0    | 47.8<br>$\pm$ 0.5    | 46.8<br>$\pm$ 1.9    | <b>44.6</b><br><b><math>\pm</math>0.9*</b> | 45.5<br>$\pm$ 2.1    | 44.8<br>$\pm$ 1.2    | 46.4<br>$\pm$ 1.7    | 46.3<br>$\pm$ 0.9    |
| MCV (fL)                                | 63.3<br>$\pm$ 2.2    | 64.8<br>$\pm$ 2.8    | 63.2<br>$\pm$ 1.9    | 60.8<br>$\pm$ 2.5                          | 58.2<br>$\pm$ 1.0    | 58.8<br>$\pm$ 0.4    | 58.1<br>$\pm$ 1.8    | 57.8<br>$\pm$ 1.4    |
| MCHC (g/L)                              | 317<br>$\pm$ 6       | 311<br>$\pm$ 1       | 310<br>$\pm$ 5       | 314<br>$\pm$ 5                             | 328<br>$\pm$ 3       | 329<br>$\pm$ 8       | 333<br>$\pm$ 6       | 327<br>$\pm$ 10      |
| MCH (pg)                                | 20.1<br>$\pm$ 1.0    | 20.2<br>$\pm$ 0.8    | 19.6<br>$\pm$ 0.6    | 19.1<br>$\pm$ 0.8                          | 19.1<br>$\pm$ 0.3    | 19.3<br>$\pm$ 0.5    | 19.4<br>$\pm$ 0.2    | 18.9<br>$\pm$ 0.3    |
| Platelet count (X10 <sup>9</sup> /L)    | 1248<br>$\pm$ 96     | 1221<br>$\pm$ 152    | 1241<br>$\pm$ 134    | 1145<br>$\pm$ 32                           | 1224<br>$\pm$ 117    | 1097<br>$\pm$ 122    | 1091<br>$\pm$ 33     | 996<br>$\pm$ 123     |
| MPV (fL)                                | 11.4<br>$\pm$ 0.5    | 11.3<br>$\pm$ 0.2    | 11.4<br>$\pm$ 0.5    | 11.5<br>$\pm$ 0.2                          | 10.7<br>$\pm$ 0.6    | 10.7<br>$\pm$ 0.3    | 10.9<br>$\pm$ 0.2    | 10.7<br>$\pm$ 0.1    |
| PDW (%)                                 | 50.8<br>$\pm$ 0.7    | 50.8<br>$\pm$ 3.1    | 50.1<br>$\pm$ 1.2    | 49.8<br>$\pm$ 1.9                          | 47.7<br>$\pm$ 1.3    | 48.1<br>$\pm$ 0.2    | 49.4<br>$\pm$ 0.2    | 49.5<br>$\pm$ 1.3    |
| Neutrophil percent (%)                  | 12.0<br>$\pm$ 2.8    | 10.6<br>$\pm$ 2.3    | 14.7<br>$\pm$ 7.3    | 14.8<br>$\pm$ 6.0                          | 14.5<br>$\pm$ 5.5    | 13.5<br>$\pm$ 1.2    | 13.9<br>$\pm$ 4.3    | 23.4<br>$\pm$ 21.2   |
| Lymphocyte percent (%)                  | 83.4<br>$\pm$ 2.8    | 85.1<br>$\pm$ 2.2    | 79.6<br>$\pm$ 6.3    | 80.3<br>$\pm$ 6.9                          | 81.8<br>$\pm$ 4.9    | 82.2<br>$\pm$ 1.0    | 80.0<br>$\pm$ 5.5    | 71.7<br>$\pm$ 21.6   |
| Mononuclear percent (%)                 | 2.80<br>$\pm$ 0.53   | 2.43<br>$\pm$ 0.32   | 3.20<br>$\pm$ 0.79   | 3.00<br>$\pm$ 0.17                         | 1.77<br>$\pm$ 0.42   | 2.10<br>$\pm$ 0.10   | 3.27<br>$\pm$ 1.63   | 2.73<br>$\pm$ 0.49   |
| Eosinophil percent (%)                  | 0.63<br>$\pm$ 0.15   | 0.50<br>$\pm$ 0.17   | 0.70<br>$\pm$ 0.17   | 0.57<br>$\pm$ 0.38                         | 0.93<br>$\pm$ 0.25   | 0.77<br>$\pm$ 0.12   | 0.97<br>$\pm$ 0.64   | 0.70<br>$\pm$ 0.10   |
| Basophil percent (%)                    | 0.30<br>$\pm$ 0.00   | 0.40<br>$\pm$ 0.10   | 0.33<br>$\pm$ 0.06   | 0.27<br>$\pm$ 0.06                         | 0.30<br>$\pm$ 0.10   | 0.27<br>$\pm$ 0.06   | 0.27<br>$\pm$ 0.06   | 0.33<br>$\pm$ 0.06   |
| LUC (%)                                 | 0.87<br>$\pm$ 0.21   | 1.00<br>$\pm$ 0.35   | 1.47<br>$\pm$ 0.23   | 1.03<br>$\pm$ 0.40                         | 0.73<br>$\pm$ 0.25   | 1.10<br>$\pm$ 0.30   | 1.57<br>$\pm$ 0.45   | 1.13<br>$\pm$ 0.32   |
| Neutrophil count (X10 <sup>9</sup> /L)  | 1.23<br>$\pm$ 0.41   | 1.16<br>$\pm$ 0.31   | 1.64<br>$\pm$ 1.00   | 1.44<br>$\pm$ 0.74                         | 1.02<br>$\pm$ 0.56   | 0.97<br>$\pm$ 0.09   | 1.17<br>$\pm$ 0.14   | 2.16<br>$\pm$ 2.10   |
| Lymphocyte count (X10 <sup>9</sup> /L)  | 8.53<br>$\pm$ 1.91   | 9.28<br>$\pm$ 0.61   | 8.58<br>$\pm$ 0.58   | 7.54<br>$\pm$ 1.41                         | 5.49<br>$\pm$ 2.12   | 5.92<br>$\pm$ 1.05   | 7.18<br>$\pm$ 2.47   | 6.25<br>$\pm$ 1.53   |
| Mononuclear count (X10 <sup>9</sup> /L) | 0.30<br>$\pm$ 0.13   | 0.26<br>$\pm$ 0.03   | 0.34<br>$\pm$ 0.09   | 0.29<br>$\pm$ 0.08                         | 0.12<br>$\pm$ 0.07   | 0.15<br>$\pm$ 0.02   | 0.29<br>$\pm$ 0.12   | 0.24<br>$\pm$ 0.06   |
| Basophil count (X10 <sup>9</sup> /L)    | 0.033<br>$\pm$ 0.006 | 0.040<br>$\pm$ 0.010 | 0.033<br>$\pm$ 0.006 | 0.027<br>$\pm$ 0.012                       | 0.020<br>$\pm$ 0.010 | 0.017<br>$\pm$ 0.006 | 0.020<br>$\pm$ 0.010 | 0.030<br>$\pm$ 0.000 |
| Eosinophil count (X10 <sup>9</sup> /L)  | 0.063                | 0.053                | 0.077                | 0.057                                      | 0.060                | 0.057                | 0.083                | 0.063                |

|                                                |        |        |        |        |        |        |        |        |
|------------------------------------------------|--------|--------|--------|--------|--------|--------|--------|--------|
|                                                | ±0.006 | ±0.015 | ±0.021 | ±0.047 | ±0.010 | ±0.021 | ±0.045 | ±0.012 |
| <b>LUC (X10<sup>9</sup>/L)</b>                 | 0.09   | 0.10   | 0.16   | 0.10   | 0.05   | 0.08   | 0.15   | 0.10   |
|                                                | ±0.03  | ±0.03  | ±0.02  | ±0.05  | ±0.04  | ±0.03  | ±0.08  | ±0.03  |
| <b>Reticulocyte percent (%)</b>                | 6.41   | 6.49   | 5.94   | 6.91   | 2.74   | 2.65   | 2.19   | 2.55   |
|                                                | ±0.32  | ±0.50  | ±1.98  | ±1.93  | ±0.31  | ±0.72  | ±0.56  | ±0.97  |
| <b>Reticulocyte count (X10<sup>12</sup>/L)</b> | 0.47   | 0.48   | 0.44   | 0.51   | 0.21   | 0.20   | 0.17   | 0.20   |
|                                                | ±0.02  | ±0.05  | ±0.13  | ±0.13  | ±0.03  | ±0.05  | ±0.05  | ±0.07  |
| <b>CHCM (g/L)</b>                              | 318    | 315    | 315    | 319    | 334    | 332    | 335    | 333    |
|                                                | ±7     | ±3     | ±7     | ±4     | ±6     | ±9     | ±6     | ±8     |
| <b>Erythrocyte percent (%)</b>                 | 13.3   | 13.3   | 12.9   | 13.5   | 10.8   | 11.0   | 10.7   | 11.1   |
|                                                | ±0.6   | ±0.5   | ±1.3   | ±0.6   | ±0.1   | ±0.2   | ±0.5   | ±0.2   |
| <b>HDW (g/L)</b>                               | 23.3   | 23.1   | 24.0   | 25.6   | 23.5   | 23.6   | 24.1   | 23.1   |
|                                                | ±1.0   | ±0.3   | ±1.0   | ±1.3   | ±1.2   | ±1.0   | ±1.6   | ±0.5   |
| <b>WBCP (X10<sup>9</sup>/L)</b>                | 9.52   | 9.96   | 10.21  | 8.76   | 6.38   | 6.85   | 8.40   | 8.60   |
|                                                | ±2.29  | ±0.70  | ±0.98  | ±1.95  | ±2.40  | ±1.01  | ±2.24  | ±1.11  |
| <b>Platelet percent (%)</b>                    | 1.42   | 1.37   | 1.42   | 1.32   | 1.31   | 1.17   | 1.19   | 1.06   |
|                                                | ±0.18  | ±0.15  | ±0.21  | ±0.05  | ±0.15  | ±0.13  | ±0.02  | ±0.12  |
| <b>LI</b>                                      | 2.65   | 2.66   | 2.73   | 2.46   | 2.54   | 2.61   | 2.53   | 2.68   |
|                                                | ±0.10  | ±0.16  | ±0.17  | ±0.10  | ±0.09  | ±0.05  | ±0.09  | ±0.21  |
| <b>MPXI</b>                                    | -0.57  | -2.37  | -3.07  | -3.27  | 1.90   | -2.07  | -1.83  | 0.40   |
|                                                | ±1.27  | ±0.46  | ±2.15  | ±1.91  | ±7.37  | ±0.90  | ±0.86  | ±5.76  |
| <b>PT (Sec)</b>                                | 13.1   | 13.1   | 12.9   | 14.8   | 12.7   | 12.8   | 12.7   | 12.2   |
|                                                | ±0.6   | ±0.2   | ±0.4   | ±3.1   | ±0.2   | ±0.3   | ±0.5   | ±0.3   |
| <b>APTT (Sec)</b>                              | 13.6   | 15.4   | 14.4   | 20.4   | 14.6   | 14.3   | 15.2   | 16.0   |
|                                                | ±1.5   | ±1.9   | ±3.3   | ±11.2  | ±1.1   | ±1.3   | ±1.5   | ±3.3   |
| <b>Fibrinogen (g/L)</b>                        | 3.39   | 3.1    | 3.40   | 3.22   | 2.64   | 2.63   | 2.25   | 2.80   |
|                                                | ±0.16  | ±0.11  | ±0.11  | ±0.19  | ±0.22  | ±0.14  | ±0.21  | ±0.24  |

\*: Significant difference from Solvent control group (1-way ANOVA and Tukey's test,  $P \leq 0.05$ ).
