# Supplementary material for: Sustained relief of trigeminal neuropathic pain by a blood–brain barrier penetrable PPAR gamma agonist
Source: PubMed Central journal article supplement — Mol Pain. 2019 Nov 7;15:1744806919884498. doi: 10.1177/1744806919884498 (PMC6843736; doi:10.1177/1744806919884498), 2019-11-07
Supplement: MPX884498_Supplemetal_Table2.pdf [file MPX884498_Supplemetal_Table2.pdf]

Supplementary Table 2: Group mean- Serum biochemistry (Mean± SD, N = 3)

| Sex                 | Male            |               |               |               | Female          |               |               |               |
|---------------------|-----------------|---------------|---------------|---------------|-----------------|---------------|---------------|---------------|
| Group               | Solvent control | 30 mg/kg      | 120 mg/kg     | 450 mg/kg     | Solvent control | 30 mg/kg      | 120 mg/kg     | 450 mg/kg     |
| ALT (U/L)           | 70.7<br>±14.2   | 53.3<br>±4.5  | 86.7<br>±5.3  | 79.7<br>±25.7 | 43.7<br>±15.5   | 39.7<br>±10.7 | 59.7<br>±15.6 | 80.3<br>±26.5 |
| AST (U/L)           | 134<br>±27      | 115<br>±14    | 137<br>±8     | 125<br>±27    | 117<br>±14      | 124<br>±20    | 107<br>±9     | 115<br>±14    |
| Total Protein (g/L) | 53.8<br>±1.7    | 54.8<br>±1.6  | 52.9<br>±2.6  | 51.5<br>±2.1  | 59.4<br>±3.2    | 53.9<br>±2.3  | 63.0<br>±3.5  | 58.8<br>±3.3  |
| Albumin (g/L)       | 33.2<br>±0.5    | 33.6<br>±0.7  | 33.1<br>±0.5  | 32.4<br>±0.4  | 36.7<br>±2.0    | 36.3<br>±1.2  | 39.0<br>±1.4  | 36.5<br>±1.3  |
| Creatinine (μM)     | 20.7<br>±1.5    | 23.3<br>±3.1  | 20.7<br>±1.1  | 17.7<br>±2.5  | 26.0<br>±2.0    | 25.7<br>±1.5  | 24.0<br>±3.0  | 22.7<br>±2.5  |
| ALP (U/L)           | 240<br>±50      | 217<br>±40    | 269<br>±54    | 299<br>±50    | 121<br>±11      | 98<br>±4      | 92<br>±19     | 136<br>±17    |
| Calcium (mM)        | 2.47<br>±0.07   | 2.40<br>±0.09 | 2.42<br>±0.08 | 2.45<br>±0.07 | 2.40<br>±0.07   | 2.39<br>±0.04 | 2.54<br>±0.08 | 2.47<br>±0.09 |
| Glucose (mM)        | 4.88<br>±0.39   | 5.14<br>±0.57 | 4.63<br>±0.08 | 5.51<br>±0.75 | 6.14<br>±0.39   | 6.22<br>±0.61 | 5.97<br>±0.21 | 6.58<br>±0.27 |
| Total bilirubin(μM) | 1.71<br>±0.18   | 1.43<br>±0.50 | 1.62<br>±0.33 | 1.03<br>±0.60 | 1.37<br>±0.40   | 1.07<br>±0.05 | 1.47<br>±0.05 | 1.01<br>±0.33 |
| GGT (U/L)           | 0.67<br>±0.58   | 0.67<br>±0.58 | 1.33<br>±0.58 | 1.33<br>±0.58 | 0.67<br>±0.58   | 1.00<br>±1.00 | 0.33<br>±0.58 | 1.67<br>±0.58 |
| LDH (U/L)           | 830<br>±520     | 386<br>±207   | 505<br>±250   | 406<br>±240   | 522<br>±169     | 570<br>±296   | 477<br>±258   | 370<br>±114   |
| CK (U/L)            | 818<br>±465     | 460<br>±165   | 489<br>±139   | 412<br>±183   | 436<br>±150     | 493<br>±227   | 374<br>±155   | 350<br>±41    |
| Urea (mM)           | 4.80<br>±0.26   | 4.93<br>±0.76 | 4.87<br>±1.03 | 5.00<br>±1.04 | 4.17<br>±0.50   | 4.83<br>±0.12 | 7.07<br>±1.50 | 5.47<br>±0.57 |
| TC (mM)             | 1.94<br>±0.11   | 1.65<br>±0.29 | 1.86<br>±0.55 | 1.83<br>±0.14 | 1.71<br>±0.35   | 1.52<br>±0.15 | 1.91<br>±0.16 | 2.24<br>±0.31 |
| TG (mM)             | 0.62<br>±0.22   | 0.45<br>±0.05 | 0.56<br>±0.15 | 0.36<br>±0.04 | 0.39<br>±0.09   | 0.31<br>±0.07 | 0.58<br>±0.34 | 0.40<br>±0.15 |
| Phosphorus (mM)     | 2.95<br>±0.03   | 2.86<br>±0.32 | 3.23<br>±0.37 | 3.21<br>±0.40 | 2.21<br>±0.23   | 2.43<br>±0.19 | 2.41<br>±0.21 | 2.44<br>±0.29 |
| A/G                 | 1.63<br>±0.06   | 1.57<br>±0.06 | 1.67<br>±0.15 | 1.73<br>±0.15 | 1.63<br>±0.06   | 2.13<br>±0.49 | 1.63<br>±0.06 | 1.63<br>±0.12 |
| Globulin (g/L)      | 20.6<br>±1.2    | 21.1<br>±1.2  | 19.8<br>±2.1  | 19.1<br>±1.7  | 22.7<br>±1.4    | 17.6<br>±3.3  | 24.0<br>±2.1  | 22.3<br>±2.0  |
| Sodium ion (mM)     | 143<br>±0       | 143<br>±1     | 143<br>±1     | 143<br>±0     | 142<br>±1       | 141<br>±0     | 140<br>±0     | 141<br>±2     |
| Potassium (mM)      | 4.74<br>±0.19   | 4.47<br>±0.34 | 4.91<br>±0.60 | 4.78<br>±0.78 | 3.99<br>±0.17   | 4.28<br>±0.12 | 4.38<br>±0.25 | 4.34<br>±0.30 |
| Chloride ion (mM)   | 103<br>±1       | 104<br>±2     | 104<br>±2     | 104<br>±1     | 105<br>±1       | 106<br>±1     | 105<br>±1     | 105<br>±0     |

\*: Significant difference from Solvent control group (1-way ANOVA and Tukey's test, P ≤ 0.05).
